# Supplementary material for: Automatic Detection of Moths (Lepidoptera) with a Funnel Trap Prototype
Source: MDPI journal article supplement (doi:10.3390/insects14040381), 2023-04-13
Supplement: s1 [file s1]

**Table S1.** Summary of probes (sensors installed into traps) used to automatically detect flying insects in the field. Sensor type describes the sensor used in the experiment; Trap type: the used type of trap; Target species; Capturing insect: the method which way they capture the given target taxa; Species selectivity: how do they gain species specificity; Publication

Abbreviations: IR: infrared

| Sensor type                                                                                              | Trap type                               | Target species                                         | Capturing insects                              | Species selectivity | Publication                               |
|----------------------------------------------------------------------------------------------------------|-----------------------------------------|--------------------------------------------------------|------------------------------------------------|---------------------|-------------------------------------------|
| <b>Opto-electronic sensors</b>                                                                           |                                         |                                                        |                                                |                     |                                           |
| Double-counting IR sensor                                                                                | trapping tube placed in a bottle        | <i>Bactrocera dorsalis</i>                             | insects cross alive                            | pheromone           | Jiang, et al. [13], Okuyama, et al. [52]  |
| IR interrupter controller, MSP-based sensing device and WSN-based monitoring station, two infrared gates | trapping tube placed in a bottle        | <i>Bactrocera dorsalis</i>                             | living insects, (crawling through, the sensor) | pheromone           | Jiang, et al. [25], Chuang and Jiang [53] |
| IR sensors                                                                                               | bucket trap                             | <i>Bactrocera dorsalis</i> ,<br><i>Cydia pomonella</i> | insects fall through the sensor                | pheromone           | Holguin, et al. [14]                      |
| double counting IR sensor set                                                                            | C-DAIS pheromone insect-trapping device | <i>Spodoptera litura</i>                               | insects fall through the sensor                | pheromone           | Shieh, et al. [26]                        |
| IR sensor                                                                                                | cylindrical plastic trap                | <i>Ceratitis capitata</i>                              | dead or stunned                                | pheromone           | Goldshtein, et al. [54]                   |

|                                                                |                                                |                                 |                                 |                                                                                                |                             |
|----------------------------------------------------------------|------------------------------------------------|---------------------------------|---------------------------------|------------------------------------------------------------------------------------------------|-----------------------------|
| infrared camera                                                | polypropylene food containers with sticky card | <i>Grapholita molesta</i>       | stuck insects                   | pheromone or live female                                                                       | Pérez Aparicio, et al. [44] |
| IR sensor                                                      | cone type trap                                 | <i>Grapholita molesta</i>       | insects fall through the sensor | pheromone                                                                                      | Kim, et al. [17]            |
| <b>Laser-radar (lidar) system</b>                              |                                                |                                 |                                 |                                                                                                |                             |
| lidar                                                          | no trap                                        | atmospheric insect fauna        | no                              | not, only for quantitative measurement                                                         | Brydegaard, et al. [55]     |
| continuous-wave Scheimpflug lidar system                       | no trap                                        | rice field insects (12 species) | no                              | not, only for quantitative measurement                                                         | Song, et al. [56]           |
| Passive kHz lidar                                              | no trap                                        | aerofauna                       | free flying insects             | for monitoring abundances and fluxes of pests and disease vectors in the atmosphere            | Jansson and Brydegaard [57] |
| lidar                                                          | UV light trap                                  | flying insects                  | free flying insects             | for quantifying flying insect abundance; distinguish three insect clusters based on morphology | Kirkeby, et al. [58]        |
| <b>Acoustic, Opto-acoustic sensors</b>                         |                                                |                                 |                                 |                                                                                                |                             |
| bimodal optoelectronic sensor based on stereo recording device | McPhail trap                                   | fruit flies                     | insects flying trough           | spectrum of the wingbeat                                                                       | Potamitis, et al. [8]       |

|                                |                                                            |                                                   |                                 |                                            |                            |
|--------------------------------|------------------------------------------------------------|---------------------------------------------------|---------------------------------|--------------------------------------------|----------------------------|
| acoustic piezoelectric counter | modified milk carton trap                                  | <i>Lymantria dispar</i>                           | insects flying in               | pheromone                                  | Tobin, et al. [59]         |
| microphone, camcorder          | Jackson trap                                               | <i>Ceratitis capitata</i>                         | free flying insects             | wingbeat frequency                         | Mankin, et al. [7]         |
| radio signal                   | electric insect trap with pheromone, not fluorescent light | <i>Plutella xylostella</i>                        | insects flying into to the trap | pheromone                                  | Hirafuji, et al. [60]      |
| <b>Audio sensors</b>           |                                                            |                                                   |                                 |                                            |                            |
| camera                         | sticky trap                                                | whitefly, trips and aphid                         | stuck insects                   | quantitative measurement                   | Rustia,et al. [10]         |
| camera                         | sticky trap                                                | lacewings, diabrotica, whitefly, thrips and aphid | stuck insects                   | machine vision technique                   | Solis-Sánchez, et al. [61] |
| camera                         | modified McPhail trap                                      | <i>Bactrocera oleae</i>                           | dead insects in the liquid      | non specific ammonium sulphate             | Doitsidis, et al. [62]     |
| mobile phone camera            | sticky pheromone trap (modified Promotrap)                 | <i>Cydia pomonella</i>                            | stuck insects                   | pheromone                                  | Guarnieri, et al. [63]     |
| camera                         | sticky trap                                                | <i>Aonidiella aurantii</i>                        | stuck insects                   | pheromone                                  | Frewin, et al. [9]         |
| camera                         | mobile robot car                                           | <i>Pyralidae</i>                                  | insects on the vegetation       | image analysis (inverse histogram mapping) | Liu, et al. [64]           |
| camera                         | red coloured Rebell® sticky traps                          | <i>Drosophila suzukii</i>                         | stuck insects                   | captive animals, experts + neural network  | Roosjen, et al. [12]       |

|                |                                           |                              |               |                                                    |                                           |
|----------------|-------------------------------------------|------------------------------|---------------|----------------------------------------------------|-------------------------------------------|
| digital camera | adhesive liner                            | <i>Cydia pomonella</i>       | stuck insects | pheromone                                          | Ding and Taylor [65]                      |
| camera         | iMETOS iSCOUT®<br>pheromone model         | <i>Grapholita molesta</i>    | stuck insects | pheromone                                          | Ascolese, et al.[51]                      |
| camera         | PESSL iMETOS<br>iSCOUT® FruitFly<br>model | <i>Bactrocera dorsalis</i>   | stuck insects | torula yeast                                       | Ascolese, et al.[51]                      |
| camera         | Trapview Standard<br>model (delta trap)   | <i>Grapholita molesta</i>    | stuck insects | pheromone                                          | Ascolese, et al.[51]                      |
| camera         | Trapview Self-<br>Cleaning<br>model       | <i>Bactrocera dorsalis</i>   | stuck insects | methyl-eugenol                                     | Ascolese, et al.[51]                      |
| camera         | Trapview Fly model<br>(cylindrical trap)  | <i>Bactrocera dorsalis</i>   | stuck insects | torula yeast and methyl-<br>eugenol                | Ascolese, et al.[51]                      |
| camera         | sticky sheet                              | <i>Resseliella theobaldi</i> | stuck insect  | pheromone                                          | Sipos, et al. [66]                        |
| camera         | sticky cards                              | <i>Drosophila suzukii</i>    | stuck insect  | apple cider vinegar or non                         | Geissmann, et al. [67]                    |
| camera         | delta trap                                | <i>Lobesia botrana</i>       | stuck insect  | pheromone                                          | Ünlü, et al. [50]                         |
| camera         | Trapview                                  | <i>Cydia pomonella</i>       | stuck insect  | five-component sex<br>pheromone-kairomone<br>blend | Preti, et al. [68], Preti, et al.<br>[40] |
| camera         | delta trap                                | <i>Cydia pomonella</i>       | stuck insect  | pheromone                                          | Schrader, et al. [69]                     |

## References:

7. Mankin, R.; Machan, R.; Jones, R. In *Field testing of a prototype acoustic device for detection of Mediterranean fruit flies flying into a trap*, Proc. 7th Int. Symp. Fruit Flies of Economic Importance, **2006**; 2006; pp 10-15.
8. Potamitis, I.; Rigakis, I.; Vidakis, N.; Petousis, M.; Weber, M., Affordable bimodal optical sensors to spread the use of automated insect monitoring. *Journal of Sensors* **2018**, 1-25.
9. Frewin, A.; Lopez, B.; Cox, A.; Hoffman, E.; Hazell, J., Comparison of two traps for monitoring California red scale (Hemiptera: Diaspididae). *Florida Entomologist* **2019**, 102, (3), 586-591.
10. Rustia, D. J. A.; Lin, C. E.; Chung, J.-Y.; Zhuang, Y.-J.; Hsu, J.-C.; Lin, T.-T., Application of an image and environmental sensor network for automated greenhouse insect pest monitoring. *Journal of Asia-Pacific Entomology* **2020**, 23, (1), 17-28.
12. Roosjen, P. P.; Kellenberger, B.; Kooistra, L.; Green, D. R.; Fahrentrapp, J., Deep learning for automated detection of *Drosophila suzukii*: potential for UAV - based monitoring. *Pest Management Science* **2020**.
13. Jiang, J.-A.; Tseng, C.-L.; Lu, F.-M.; Yang, E.-C.; Wu, Z.-S.; Chen, C.-P.; Lin, S.-H.; Lin, K.-C.; Liao, C.-S., A GSM-based remote wireless automatic monitoring system for field information: A case study for ecological monitoring of the oriental fruit fly, *Bactrocera dorsalis* (Hendel). *Computers and electronics in agriculture* **2008**, 62, (2), 243-259.
14. Holguin, G. A.; Lehman, B. L.; Hull, L. A.; Jones, V. P.; Park, J., Electronic traps for automated monitoring of insect populations. *IFAC Proceedings Volumes* **2010**, 43, (26), 49-54.
17. Kim, Y.; Jung, S.; Kim, Y.; Lee, Y., Real-time monitoring of oriental fruit moth, *Grapholita molesta*, populations using a remote sensing pheromone trap in apple orchards. *Journal of Asia-Pacific Entomology* **2011**, 14, (3), 259-262.
25. Jiang, J.-A.; Lin, T.-S.; Yang, E.-C.; Tseng, C.-L.; Chen, C.-P.; Yen, C.-W.; Zheng, X.-Y.; Liu, C.-Y.; Liu, R.-H.; Chen, Y.-F., Application of a web-based remote agro-ecological monitoring system for observing spatial distribution and dynamics of *Bactrocera dorsalis* in fruit orchards. *Precision Agriculture* **2013**, 14, (3), 323-342.
26. Shieh, J.-C.; Wang, J.-Y.; Lin, T.-S.; Lin, C.-H.; Yang, E.-C.; Tsai, Y.-J.; Tsai, H.-T.; Chiou, M.-T.; Lu, F.-M.; Jiang, J.-A., A GSM-based field monitoring system for *Spodoptera litura* (Fabricius). *Engineering in agriculture, environment and food* **2011**, 4, (3), 77-82.
40. Preti, M.; Favaro, R.; Knight, A. L.; Angeli, S., Remote monitoring of *Cydia pomonella* adults among an assemblage of nontargets in sex pheromone - kairomone - baited smart traps. *Pest management science* **2021b**, 77, (9), 4084-4090.
44. Pérez Aparicio, A.; Llorens Calveras, J.; Rosell Polo, J. R.; Martí, J.; Gemenio Marín, C., A cheap electronic sensor automated trap for monitoring the flight activity period of moths. *European Journal Of Entomology*, 2021, vol. 118, p. 315-321 **2021**.
50. Ünlü, L.; Akdemir, B.; Ögür, E.; Şahin, İ., Remote monitoring of European grapevine moth, *Lobesia botrana* (Lepidoptera: Tortricidae) population using camera-based pheromone traps in vineyards. *Turkish Journal of Agriculture-Food Science and Technology* **2019**, 7, (4), 652-657.
51. Ascolese, R.; Gargiulo, S.; Pace, R.; Nappa, P.; Griffo, R.; Nugnes, F.; Bernardo, U., E - traps: A valuable monitoring tool to be improved. *EPPO Bulletin* **2022**, 52, (1), 175-184.
52. Okuyama, T.; Yang, E.-C.; Chen, C.-P.; Lin, T.-S.; Chuang, C.-L.; Jiang, J.-A., Using automated monitoring systems to uncover pest population dynamics in agricultural fields. *Agricultural Systems* **2011**, 104, (9), 666-670.
53. Chuang, C.-L.; Jiang, J.-A., ICT-based Remote Agro-Ecological Monitoring System—A Case Study in Taiwan. *Journal of Communication, Navigation, Sensing and Services (CONASENSE)* **2014**, 1, (1), 67-92.
54. Goldshtein, E.; Cohen, Y.; Hetzroni, A.; Gazit, Y.; Timar, D.; Rosenfeld, L.; Grinshpon, Y.; Hoffman, A.; Mizrach, A., Development of an automatic monitoring trap for Mediterranean fruit fly (*Ceratitidis capitata*) to optimize control applications frequency. *Computers and Electronics in Agriculture* **2017**, 139, 115-125.
55. Brydegaard, M.; Gebru, A.; Kirkeby, C.; Åkesson, S.; Smith, H. In *Daily evolution of the insect biomass spectrum in an agricultural landscape accessed with lidar*, EPJ Web of Conferences, 2016; EDP Sciences: 2016; p 22004.
56. Song, Z.; Zhang, B.; Feng, H.; Zhu, S.; Hu, L.; Brydegaard, M.; Li, Y.; Jansson, S.; Malmqvist, E.; Svanberg, K., Application of lidar remote sensing of insects in agricultural entomology on the Chinese scene. *Journal of Applied Entomology* **2020**, 144, (3), 161-169.
57. Jansson, S.; Brydegaard, M., Passive kHz lidar for the quantification of insect activity and dispersal. *Animal Biotelemetry* **2018**, 6, (1), 6.
58. Kirkeby, C.; Wellenreuther, M.; Brydegaard, M., Observations of movement dynamics of flying insects using high resolution lidar. *Scientific reports* **2016**, 6, 29083.
59. Tobin, P. C.; Klein, K. T.; Leonard, D. S., Gypsy moth (Lepidoptera: Lymantriidae) flight behavior and phenology based on field-deployed automated pheromone-baited traps. *Environmental entomology* **2009**, 38, (6), 1555-1562.
60. Hirafuji, M.; Yoichi, H.; Watanabe, T.; Asai, M.; Hu, H.; Tanaka, K.; Fukatsu, T.; Kiura, T.; Ninomiya, S.; Nagatsuka, T. In *Real-time insect monitoring system by using Field Server*, World conference on agricultural information and IT, IAALD AFITA WCCA, 2008; 2008; pp 277-282.

61. Solis-Sánchez, L. O.; Castañeda-Miranda, R.; García-Escalante, J. J.; Torres-Pacheco, I.; Guevara-González, R. G.; Castañeda-Miranda, C. L.; Alaniz-Lumbreras, P. D., Scale invariant feature approach for insect monitoring. *Computers and electronics in agriculture* **2011**, 75, (1), 92-99.
62. Doitsidis, L.; Fouskitakis, G. N.; Varikou, K. N.; Rigakis, I. I.; Chatzichristofis, S. A.; Papafilippaki, A. K.; Birouraki, A. E., Remote monitoring of the *Bactrocera oleae* (Gmelin)(Diptera: Tephritidae) population using an automated McPhail trap. *Computers and Electronics in Agriculture* **2017**, 137, 69-78.
63. Guarnieri, A.; Maini, S.; Molari, G.; Rondelli, V., Automatic trap for moth detection in integrated pest management. *Bulletin of Insectology* **2011**, 64, (2), 247-251.
64. Liu, B.; Hu, Z.; Zhao, Y.; Bai, Y.; Wang, Y., Recognition of Pyralidae Insects Using Intelligent Monitoring Autonomous Robot Vehicle in Natural Farm Scene. *arXiv preprint arXiv:1903.10827* **2019**.
65. Ding, W.; Taylor, G., Automatic moth detection from trap images for pest management. *Computers and Electronics in Agriculture* **2016**, 123, 17-28.
66. Sipos, K.; Madár, S.; Markó, M.; Péntes, B., The possibility of automation of sex pheromone trapping: Tested on *Resseliella theobaldi* (Barnes)(Dip. *African Journal of Agricultural Research* **2012**, 7, (5), 1410-1413.
67. Geissmann, Q.; Abram, P. K.; Wu, D.; Haney, C. H.; Carrillo, J., Sticky Pi is a high-frequency smart trap that enables the study of insect circadian activity under natural conditions. *PLoS Biology* **2022**, 20, (7), e3001689.
68. Preti, M.; Moretti, C.; Scarton, G.; Giannotta, G.; Angeli, S., Developing a smart trap prototype equipped with camera for tortricid pests remote monitoring. *Bulletin of insectology* **2021a**, 74, (1), 147-160.
69. Schrader, M. J.; Smytheman, P.; Beers, E. H.; Khot, L. R., An open-source low-cost imaging system plug-in for pheromone traps aiding remote insect pest population monitoring in fruit crops. *Machines* **2022**, 10, (1), 52.
