# Supplementary material for: Automatic Detection of Moths (Lepidoptera) with a Funnel Trap Prototype
Source: MDPI journal article supplement (doi:10.3390/insects14040381), 2023-04-13

**Supplement S4.** Automatic detection of individuals for the five target species over time during the monitoring period. The separate figures present data gained from different probes. Local polynomial regression fitting (loess) was applied for smoothing time-series data.

*Cameraria ohridella*

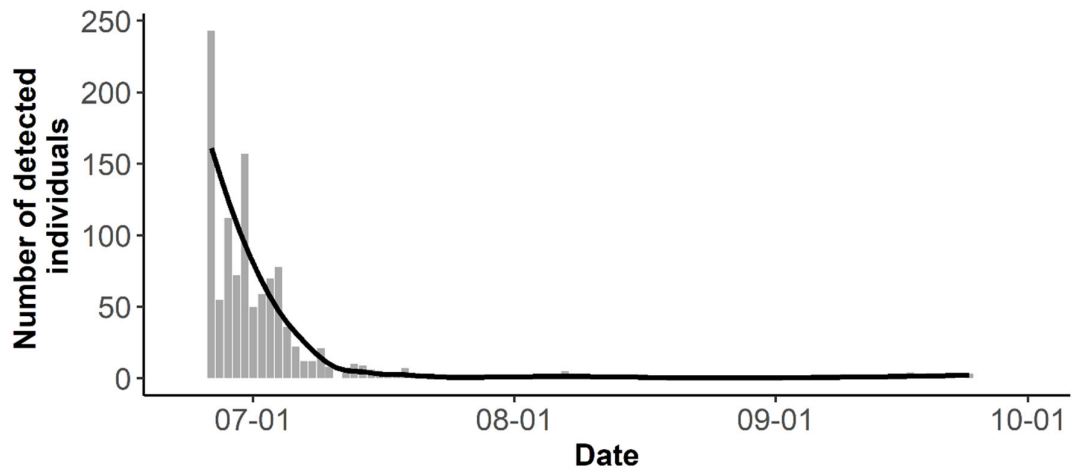

*Grapholita funebrana*

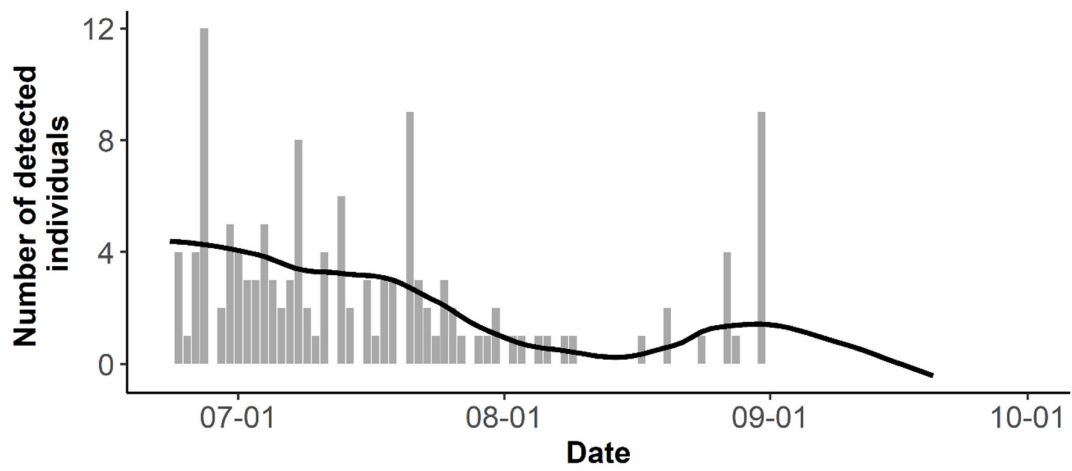

*Grapholita molesta*

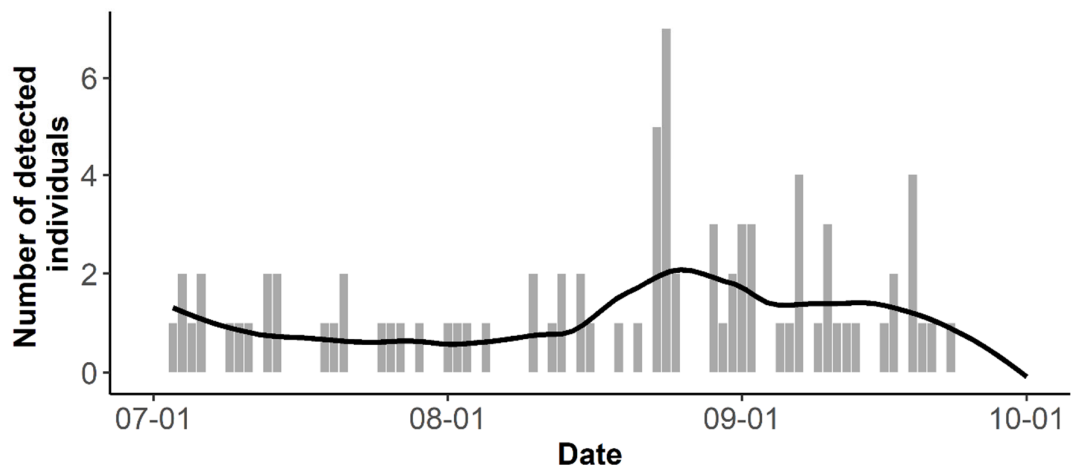

# *Autographa gamma*

V316

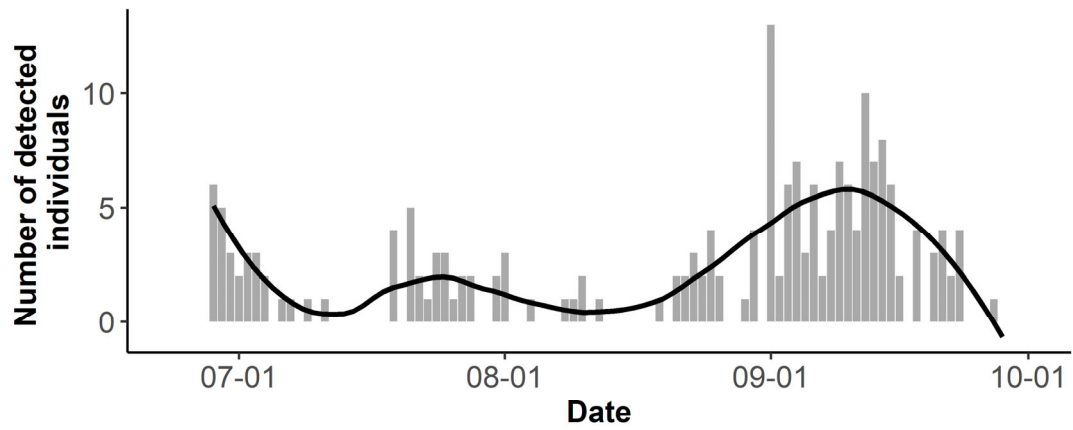

V333

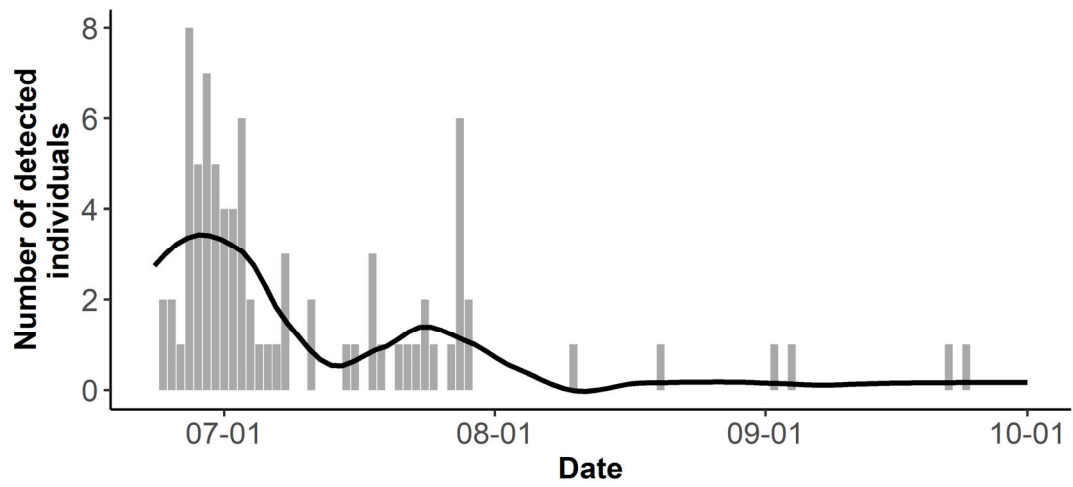

# *Agrotis segetum*

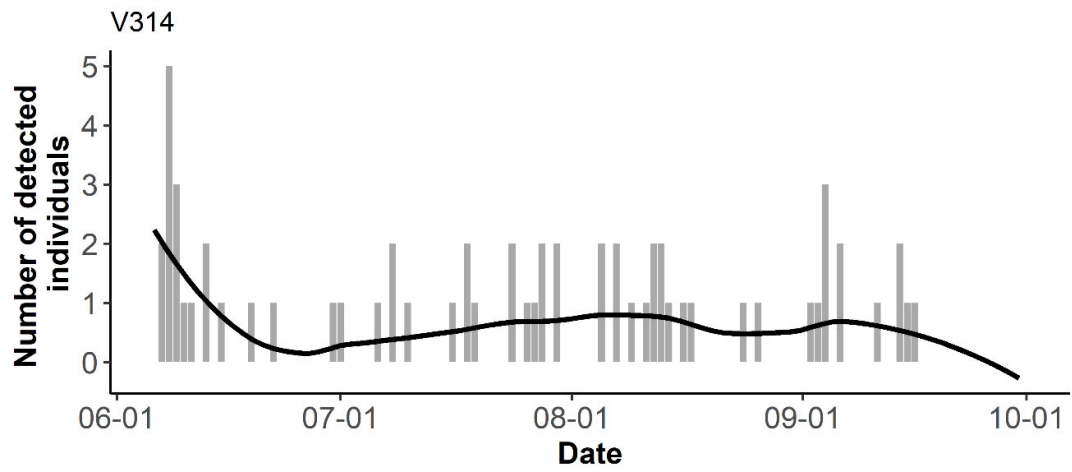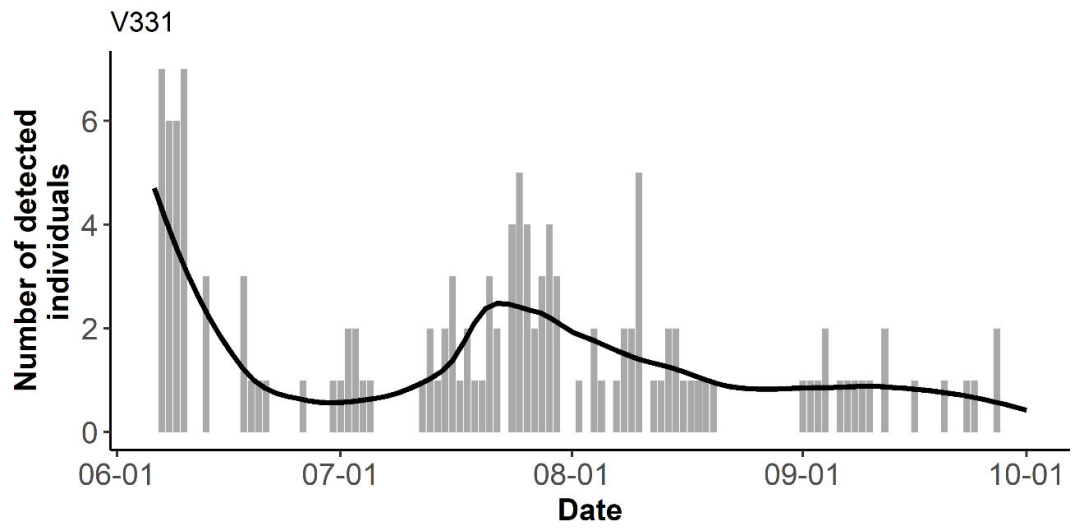

Supplement: s1 [file s1]
